# Supplementary material
Source: PubMed Central journal article supplement (PMC3703993)
Supplement: 1309755110_sapp.pdf [file 1309755110_sapp.pdf]

## Supporting Information

for “Activation and Dynamic Network of the M2 Muscarinic Receptor” by Yinglong Miao, Sara E. Nichols, Paul M. Gasper, Vincent T. Metzger, and J. Andrew McCammon.

### Methods

#### *Accelerated Molecular Dynamics*

AMD enhances the conformational sampling of biomolecules by adding a non-negative boost potential to the potential energy surface (PES) when it is lower than a reference energy (1-3):

$$\begin{aligned} V^*(r) &= V(r), & V(r) &\geq E, \\ V^*(r) &= V(r) + \Delta V(r), & V(r) &< E, \end{aligned} \quad (\text{S1})$$

where  $V(r)$  is the original potential,  $E$  is the reference energy, and  $V^*(r)$  is the modified potential. The boost potential,  $\Delta V(r)$  is given by:

$$\Delta V(r) = \frac{(E-V(r))^2}{\alpha+E-V(r)}, \quad (\text{S2})$$

where  $\alpha$  is the acceleration factor. As  $\alpha$  decreases, the PES is more flattened and biomolecular transitions between the low-energy states are further accelerated with lower energy barriers. To recover the canonical ensemble of any observable  $A(r)$ , aMD simulations are reweighted by Boltzmann distribution of the boost potential  $\Delta V(r)$  (1) using:

$$\langle A(r) \rangle = \frac{\langle A^*(r) e^{\Delta V(r)/k_B T} \rangle}{\langle e^{\Delta V(r)/k_B T} \rangle}, \quad (\text{S3})$$

where  $\langle \cdot \rangle$  denotes the trajectory average,  $A^*(r)$  is obtained from aMD,  $k_B$  is the Boltzmann constant and  $T$  is the temperature.

#### *Community Network Analysis*

Allosteric network in the M2 receptor is examined through community network analysis using the *NetworkView* plugin in VMD (4, 5). A network graph with each protein residue or the QNB antagonist treated as a node is constructed. Edges are added to the network by connecting pairs of “in-contact” nodes, which are defined as having any heavy atom within 5 Å for greater than 75% of the simulation time. Each edge is weighted by the correlation values of the two end nodes ( $C_{ij}$ ) as  $w_{ij} = -\log(|C_{ij}|)$ . The Girvan-Newman algorithm is used to divide the network

map into communities of highly intra-connected but loosely inter-connected nodes (4). The number of shortest paths that cross a given edge (“betweenness”) is calculated for all edges and the edge with greatest betweenness is removed. This process is repeated and a modularity score is tracked to identify the division that results in an optimal community network. Critical nodes located at the interface of neighboring communities and the connecting edges that describe the probability of information transfer (betweenness) are then obtained.

### ***Generalized Cross-Correlation Analysis***

Cross-correlations of residues in the M2 receptor are calculated based on mutual information between all  $C_{\alpha}$  atoms in the protein using the generalized correlation analysis approach developed by Lange and Grubmüller (6). The *g\_correlation* module in the GROMACS package (7) is applied for the analysis.

## **Simulation Protocols**

### ***System setup***

Simulations of M2 muscarinic receptor were carried out using the X-ray crystal structure of QNB-M2 complex (PDB: 3UON) that was solved at 3.0 Å resolution (8). The T4 lysozyme that was fused into the protein to replace intracellular loop 3 (ICL3) for crystallizing the receptor was omitted from all simulations, based on previous findings that removal of the bulk of ICL3 does not appear to affect GPCR function and ICL3 is highly flexible (9). All chain termini were capped with neutral groups (acetyl and methylamide). Two disulphide bonds that were resolved in the crystal structure, *i.e.*, Cys96<sup>3.25</sup>-Cys176<sup>ECL2</sup> and Cys413<sup>6.61</sup>-Cys416<sup>7.29</sup>, were maintained in the simulations (see **Fig. S1A**). Using the *psfgen* plugin in VMD (10), protein residues were set to the standard CHARMM protonation states at neutral pH, with the exception of Asp69<sup>2.50</sup> which is buried in the hydrophobic core and thus protonated (11).

The protein receptor was inserted into a palmitoyl-oleoyl-phosphatidyl-choline (POPC) bilayer with all overlapping lipid molecules removed using the *Membrane* plugin in VMD (10). The system charges were then neutralized at 0.15 M NaCl using the *Solvate* plugin in VMD (10). Simulations of the ligand-bound M2 receptor initially measured  $88 \times 85 \times 88 \text{ \AA}^3$  and contained 136 lipid molecules, 28  $\text{Na}^+$ , 39  $\text{Cl}^-$  and 9,949 water molecules, for a total of 52,702 atoms.

Periodic boundary conditions were applied in the simulations. To simulate M2 receptor in the apo state, QNB was removed from the ligand-binding site. A schematic representation of the system model is shown in **Fig. S1B**.

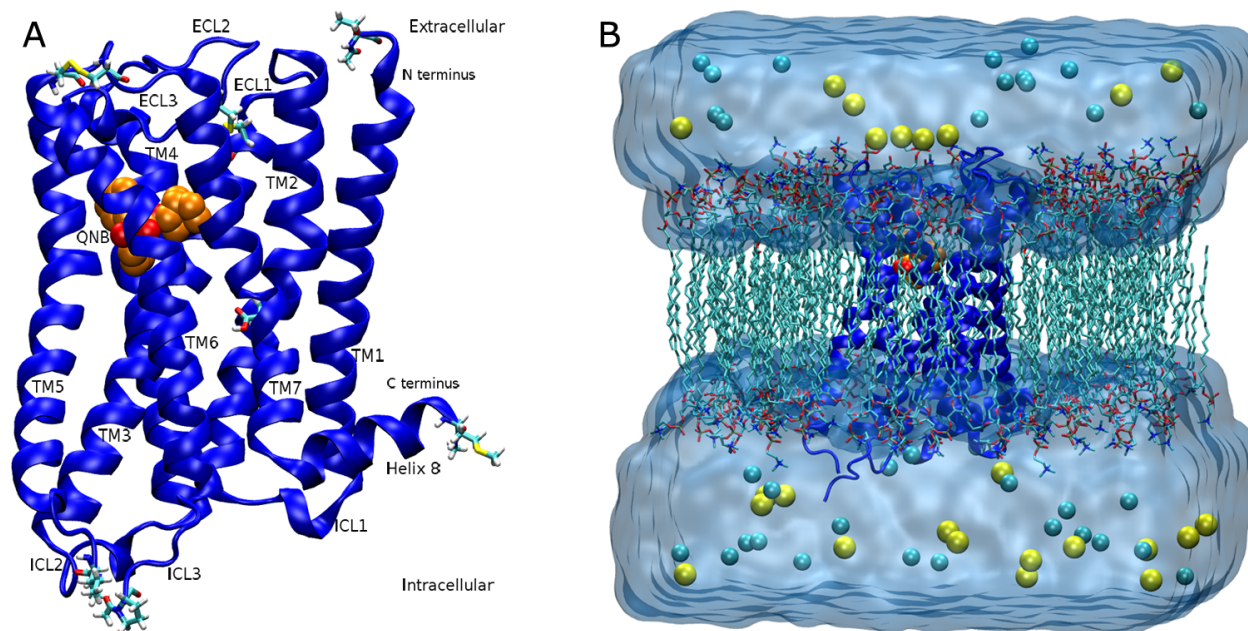

**Fig. S1** Schematic representation of M2 muscarinic receptor used in MD simulation: (A) The T4 lysozyme that was fused into the protein to replace intracellular loop 3 for crystallizing the receptor was omitted, all chain termini were capped with neutral groups (acetyl and methylamide), two disulphide bonds Cys96<sup>3.25</sup>-Cys176<sup>ECL2</sup> and Cys413<sup>6.61</sup>-Cys416<sup>7.29</sup> were maintained, and Asp69<sup>2.50</sup> was protonated in the protein. QNB atoms are shown as spheres with carbons in orange. (B) The protein receptor was inserted into a POPC bilayer and solvated in an aqueous medium of 0.15 M NaCl.

### ***Molecular Dynamics Simulations***

Molecular dynamics (MD) simulations were performed using NAMD2.9 (12). The CHARMM27 parameter set with CMAP terms was used for the protein (13, 14), CHARMM36 for the POPC lipids (15), and TIP3P model for the water molecules (16). Force field parameters of QNB that were obtained from the CHARMM ParamChem web server (17) are listed in **Appendix S1**. QNB was simulated in the protonated state as described previously (11). A cutoff distance of 12 Å was used for the van der Waals and short-range electrostatic interactions and the long-range electrostatic interactions were computed with the particle-mesh Ewald summation method (18) using a grid point density of 1/Å. A 2 fs integration time-step was used for all MD simulations and a multiple-time-stepping algorithm (12) was employed with bonded and short-range

nonbonded interactions computed every time-step and long-range electrostatic interactions every two time-steps. The SHAKE (19) algorithm was applied to all hydrogen-containing bonds.

Conventional MD (cMD) simulations of the apo and QNB-bound M2 receptor started with equilibration of the lipid tails. With all other atoms fixed, the lipid tails were energy minimized for 1000 steps using the conjugate gradient algorithm and melted with an NVT run for 0.5 ns at 310 K. The two systems were further equilibrated using an NPT run at 1 atm and 310 K for 10 ns with 5 kcal/(mol·Å<sup>2</sup>) harmonic position restraints applied to the crystallographically-identified atoms in the protein and ligand. The system volume was found to decrease with a flexible unit cell applied and level off during the second half of the 10 ns NPT run, suggesting that solvent and lipid molecules in the system were well equilibrated. Final equilibration of the two systems was performed using an NPT run at 1 atm and 310 K for 0.5 ns with all atoms unrestrained. After these minimization and equilibration procedures, the production MD simulations were performed on the two systems for 100 ns at 1 atm pressure and 310 K with a constant ratio constraint applied on the lipid bilayer in the X-Y plane.

### ***Accelerated Molecular Dynamics Simulations***

With the accelerated MD implemented in NAMD2 (20), aMD simulations were performed on the M2 receptor at two acceleration levels, *i.e.*, dihedral (1) and “dual-boost” (2). In dihedral aMD, boost potential is applied to all dihedral angles in the system with input parameters ( $E_{\text{dihed}}$ ,  $\alpha_{\text{dihed}}$ ). In dual-boost aMD, a total boost potential is applied to all atoms in the system in addition to the dihedral boost, *i.e.*, ( $E_{\text{dihed}}$ ,  $\alpha_{\text{dihed}}$ ;  $E_{\text{total}}$ ,  $\alpha_{\text{total}}$ ). A sample NAMD config file for running aMD simulations is provided in **Appendix S2**.

Starting from the final structure of the 100 ns cMD simulation, dihedral aMD simulation was performed on both the apo and QNB-bound M2 receptor reference energy  $E_{\text{dihed}}=V_{\text{dihed\_avg}} + \lambda * V_{\text{dihed\_avg}}$  and acceleration factor  $\alpha_{\text{dihed}} = \lambda * V_{\text{dihed\_avg}}/5$ , where  $V_{\text{dihed\_avg}}$  is the average dihedral energy calculated from the 100 ns cMD simulations and  $\lambda$  is an adjustable acceleration parameter. The usage of  $\lambda * V_{\text{dihed\_avg}}$ , instead of the number of residues as implemented in earlier aMD simulations of proteins (1, 21), was applied to account for the very different number of dihedrals in lipid molecules and protein amino acid residues.

In order to choose optimal acceleration parameters, five test aMD simulations were performed on the QNB-bound M2 receptor for 20 ns with  $\lambda$  equal to 0.2, 0.3, 0.4, 0.6 and 0.8.

Results showed that in comparison with the cMD simulation, the number of residues maintaining the  $\alpha$ -helix secondary structure is decreased by  $\sim 5\%$  when  $\lambda$  is increased to 0.4 and more at greater values. Considering this loss of the secondary structure at large  $\lambda$  and that proper dihedral acceleration was achieved at  $\lambda \leq 0.3$ ,  $\lambda = 0.3$  was used for the production dihedral aMD simulations. For the apo M2 receptor, two independent 100 ns dihedral aMD simulations were performed starting from the final structure of 100 ns cMD simulation with different atomic velocity initializations at 310 K. For the QNB-bound form, one 100 ns dihedral aMD simulation was performed starting from the respective final structure of the 100 ns cMD simulation.

While increased dynamics were observed in the apo M2 receptor relative to the QNB-bound form in dihedral aMD simulations, the receptor maintains its conformation very similar to that of the inactive X-ray structure with no significant structural changes in the G-protein-coupling site (see **Movie S1**). Another five dual-boost aMD simulations (one for 400 ns and four for 200 ns) that provide greater enhanced sampling were performed on apo M2 receptor by restarting from the final structure of the 100 ns cMD simulation with random atomic velocity initializations at 310 K. Boost potential was applied to both dihedral angles as above and to the total energy across all individual atoms with  $E_{\text{dihed}} = V_{\text{dihed\_avg}} + 0.3 * V_{\text{dihed\_avg}}$ ,  $\alpha_{\text{dihed}} = 0.3 * V_{\text{dihed\_avg}} / 5$ ;  $E_{\text{total}} = V_{\text{total\_avg}} + 0.2 * N_{\text{atoms}}$  and  $\alpha_{\text{total}} = 0.2 * N_{\text{atoms}}$ . A dual-boost aMD simulation was also performed on the QNB-bound form for 200 ns by restarting from the final structure of the 100 ns cMD simulation.

The cMD, dihedral and dual-boost aMD simulations that were performed on apo and QNB-bound M2 receptor are summarized in **Table S1**.

| ID    | System | Simulation     | Starting Structure      | Duration (ns) |
|-------|--------|----------------|-------------------------|---------------|
| Sim1  | QNB-M2 | cMD            | X-ray                   | 100           |
| Sim2  | apo-M2 | cMD            | X-ray without QNB       | 100           |
| Sim3  | QNB-M2 | Dihedral aMD   | Final structure of Sim1 | 100           |
| Sim4  | apo-M2 | Dihedral aMD   | Final structure of Sim2 | 100           |
| Sim5  | apo-M2 | Dihedral aMD   | Final structure of Sim2 | 100           |
| Sim6  | QNB-M2 | Dual-boost aMD | Final structure of Sim1 | 200           |
| Sim7  | apo-M2 | Dual-boost aMD | Final structure of Sim2 | 400           |
| Sim8  | apo-M2 | Dual-boost aMD | Final structure of Sim2 | 200           |
| Sim9  | apo-M2 | Dual-boost aMD | Final structure of Sim2 | 200           |
| Sim10 | apo-M2 | Dual-boost aMD | Final structure of Sim2 | 200           |
| Sim11 | apo-M2 | Dual-boost aMD | Final structure of Sim2 | 200           |

**Table S1** A list of cMD, dihedral and dual-boost aMD simulations performed on apo and QNB-bound M2 receptor.

## Simulation Results

**Fig. S2** shows the root mean square fluctuations (RMSF) of  $C_{\alpha}$  atoms in QNB-bound M2 receptor as calculated from 100 ns cMD, 100 ns aMD and 16.4  $\mu$ s Anton (11) simulations. In comparison with the cMD simulation, higher conformational fluctuations were captured by aMD of the protein, notably in the extracellular loop 3 (ECL3) region (residues Asn410 - Thr423), which is closely similar to that observed in the Anton simulation of much longer timescale.

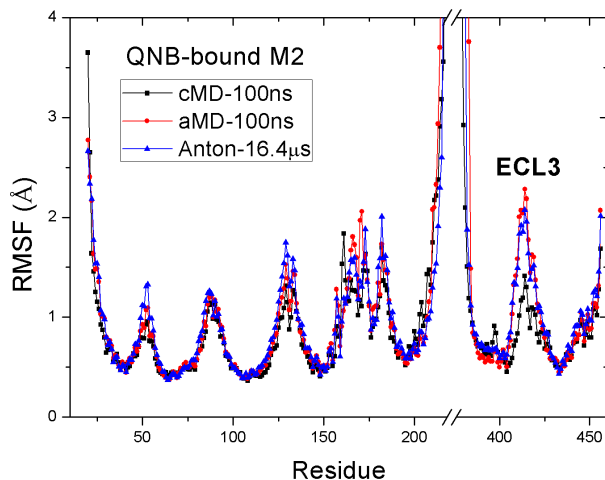

**Fig. S2** Plots of RMSF of  $C_{\alpha}$  atoms in M2 receptor calculated from 100 ns aMD, 100 ns cMD and 16.4  $\mu$ s Anton simulations depict that fluctuations of protein residues captured in aMD are equivalent to those observed in the Anton simulation of much longer timescale, notably in the ECL3 region (residues Asn410-Thr423).

**Fig. S3A** shows a comparison of the RMSF of  $C_{\alpha}$  atoms between the apo and QNB-bound forms of M2 receptor calculated from 100 ns aMD simulations. The apo form exhibits increased fluctuations in the ligand-binding region of the TM3, TM4, TM5 and TM6 helices. The three extracellular loops (ECL1-3) exhibit similar flexibility in both the apo and the QNB-bound M2 receptor. In three Anton simulations (one for 14.2  $\mu$ s and two for 1  $\mu$ s), antagonist tiotropium (TTP) was found to bind an extracellular vestibule of the apo M2 receptor but never enter the orthosteric binding site (11). Compared with the Anton simulations, fluctuations in ECL3 and part of ECL2 were found to be higher in dihedral-boost aMD simulations of apo M2 receptor (**Fig. S3B**), suggesting that the extracellular vestibule formed by ECL2 and ECL3 becomes stabilized upon TTP binding.

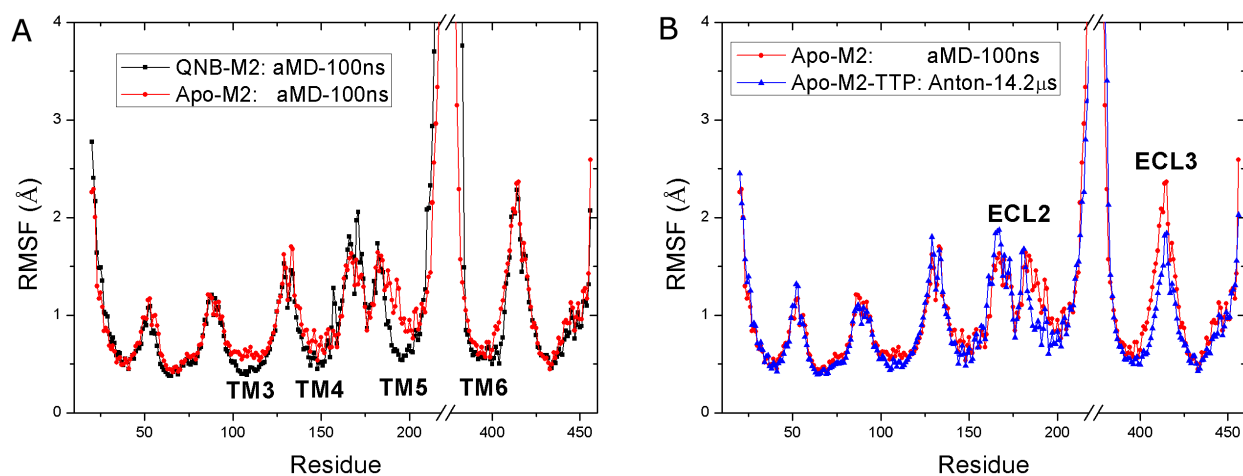

**Fig. S3** RMSF of  $C_{\alpha}$  atoms in apo M2 receptor calculated from 100 *ns* aMD simulation compared with that in (A) QNB-bound M2 receptor from 100 *ns* aMD simulation and (B) apo M2 receptor with tiotropium binding to the extracellular versitube from the average of one 14.2  $\mu$ s and two 1  $\mu$ s Anton simulations.

**Fig. S4** shows scatter plots of the RMSD of the NPxxY motif relative to the inactive X-ray structure versus the TM3-TM6 distance for the apo M2 receptor in cMD and aMD simulations. The TM3-TM6 distance is calculated between the  $C_{\alpha}$  atoms of Arg121<sup>3.50</sup> and Thr386<sup>6.34</sup> in the helical cytoplasmic ends. Significantly larger conformational space is sampled in the 400 *ns* dual-boost aMD simulation compared to the other simulations. Intermediate and active conformational states that are different from the inactive X-ray conformation can be identified from the reweighted potential of mean force as shown in **Fig. 1D**. In the four 200 *ns* dual-boost aMD simulations (Sim8-Sim11 in **Table S1**), the apo receptor visits only the intermediate state in Sim8 and Sim9 and both the intermediate and active states in Sim10 and Sim11 (**Fig. S5**).

In contrast, with antagonist QNB bound, the M2 receptor stays in the inactive state in both 16.4  $\mu$ s Anton and 200 *ns* dual-boost aMD (Sim6 in **Table S1**) simulations, although larger conformational space is sampled in the dual-boost aMD simulation (**Fig. S6**).

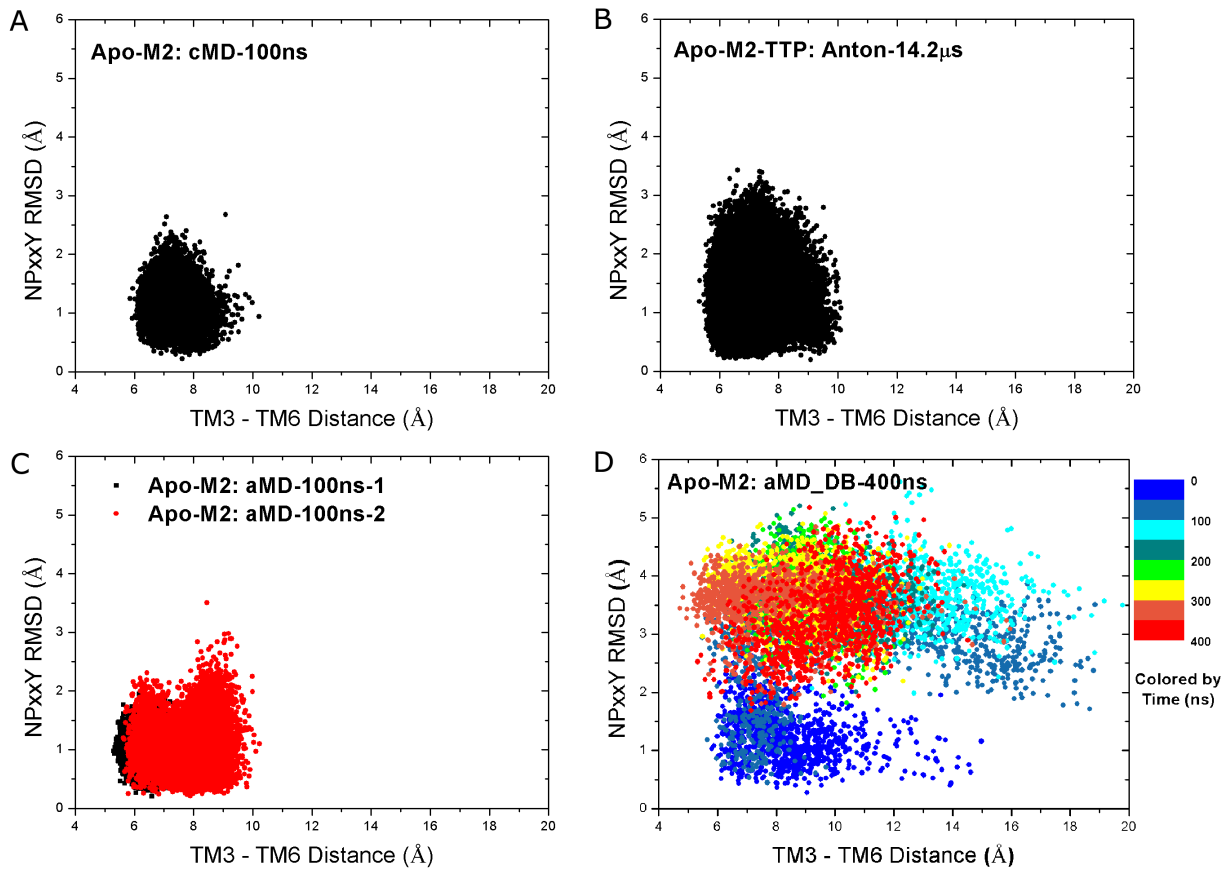

**Fig. S4** Scatter plots for the TM3-TM6 distance and RMSD of the NPxxY motif relative to the inactive X-ray structure calculated from (A) 100 ns cMD, (B) 14.2  $\mu$ s Anton TTP-binding, (C) two 100 ns dihedral aMD, and (D) the 400 ns dual-boost aMD simulations of the apo M2 receptor.



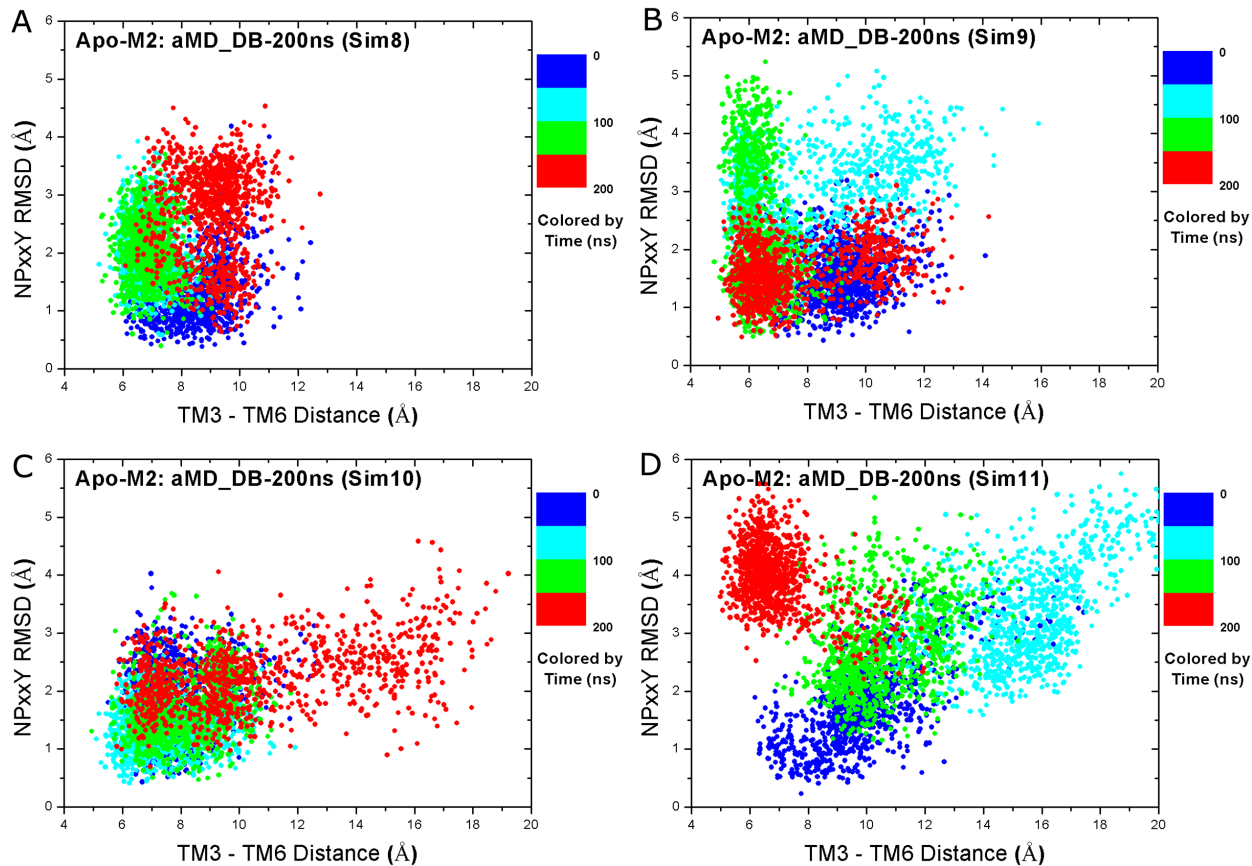

**Fig. S5** Scatter plots for the TM3-TM6 distance and RMSD of the NPxxY motif relative to the inactive X-ray structure calculated from four 200 ns dual-boost aMD simulations of the apo M2 receptor: (A) Sim8, (B) Sim9, (C) Sim10, and (D) Sim11.

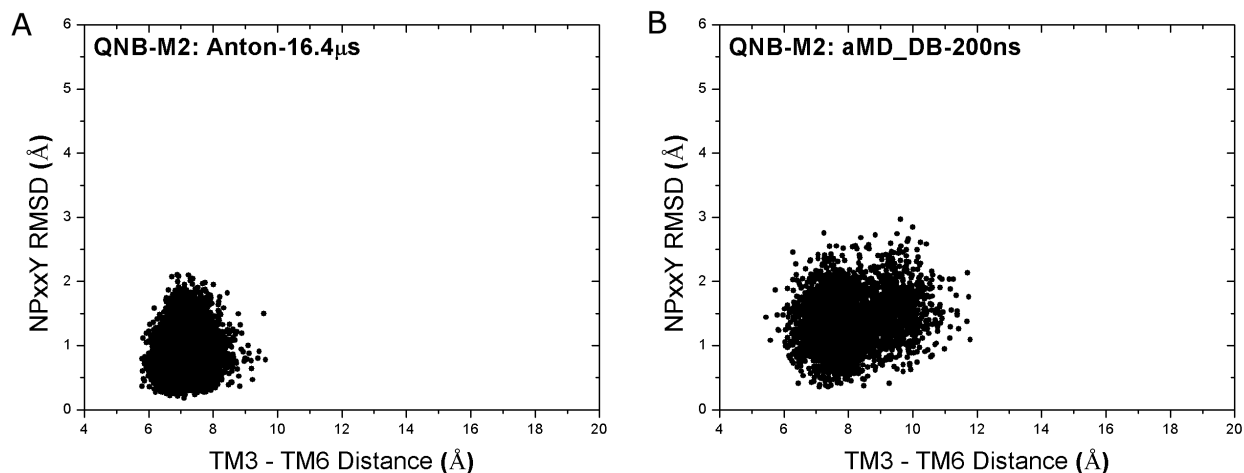

**Fig. S6** Scatter plots for the TM3-TM6 distance and RMSD of the NPxxY motif relative to the inactive X-ray structure calculated from (A) 16.4  $\mu$ s Anton and (B) the 200 ns dual-boost aMD simulations of the QNB-bound M2 receptor.

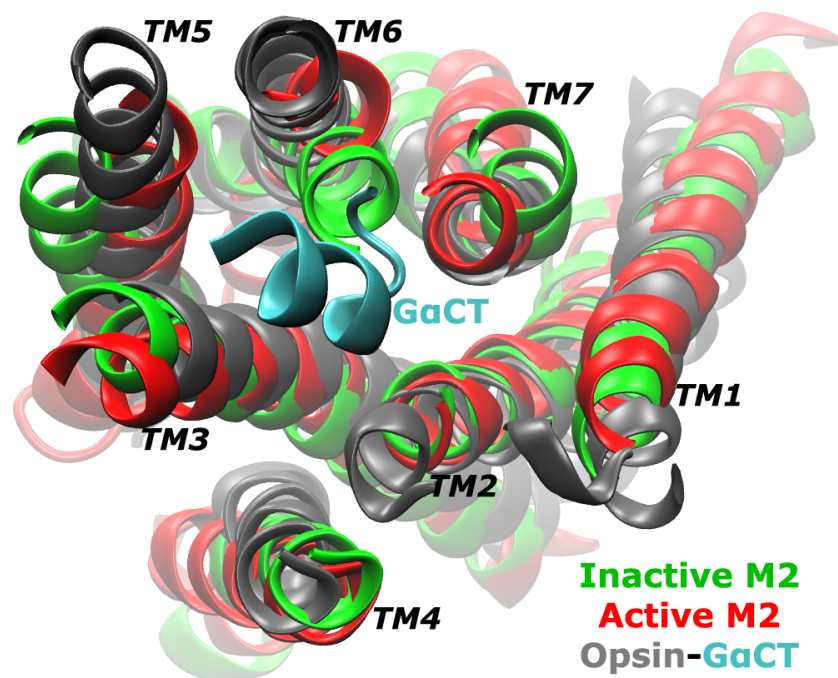

**Fig. S7** Comparison of the active M2 receptor observed in aMD simulation (red) and the opsin-G $\alpha$ CT complex (opsin: gray and G $\alpha$ CT: cyan). The structures are superimposed to the inactive X-ray structure of the M2 receptor (green) using C $\alpha$  atoms in the TM1-TM7 bundle. The active M2 receptor resembles the ligand-free opsin and its largely opened G-protein-coupling site can accommodate the G $\alpha$ CT peptide.

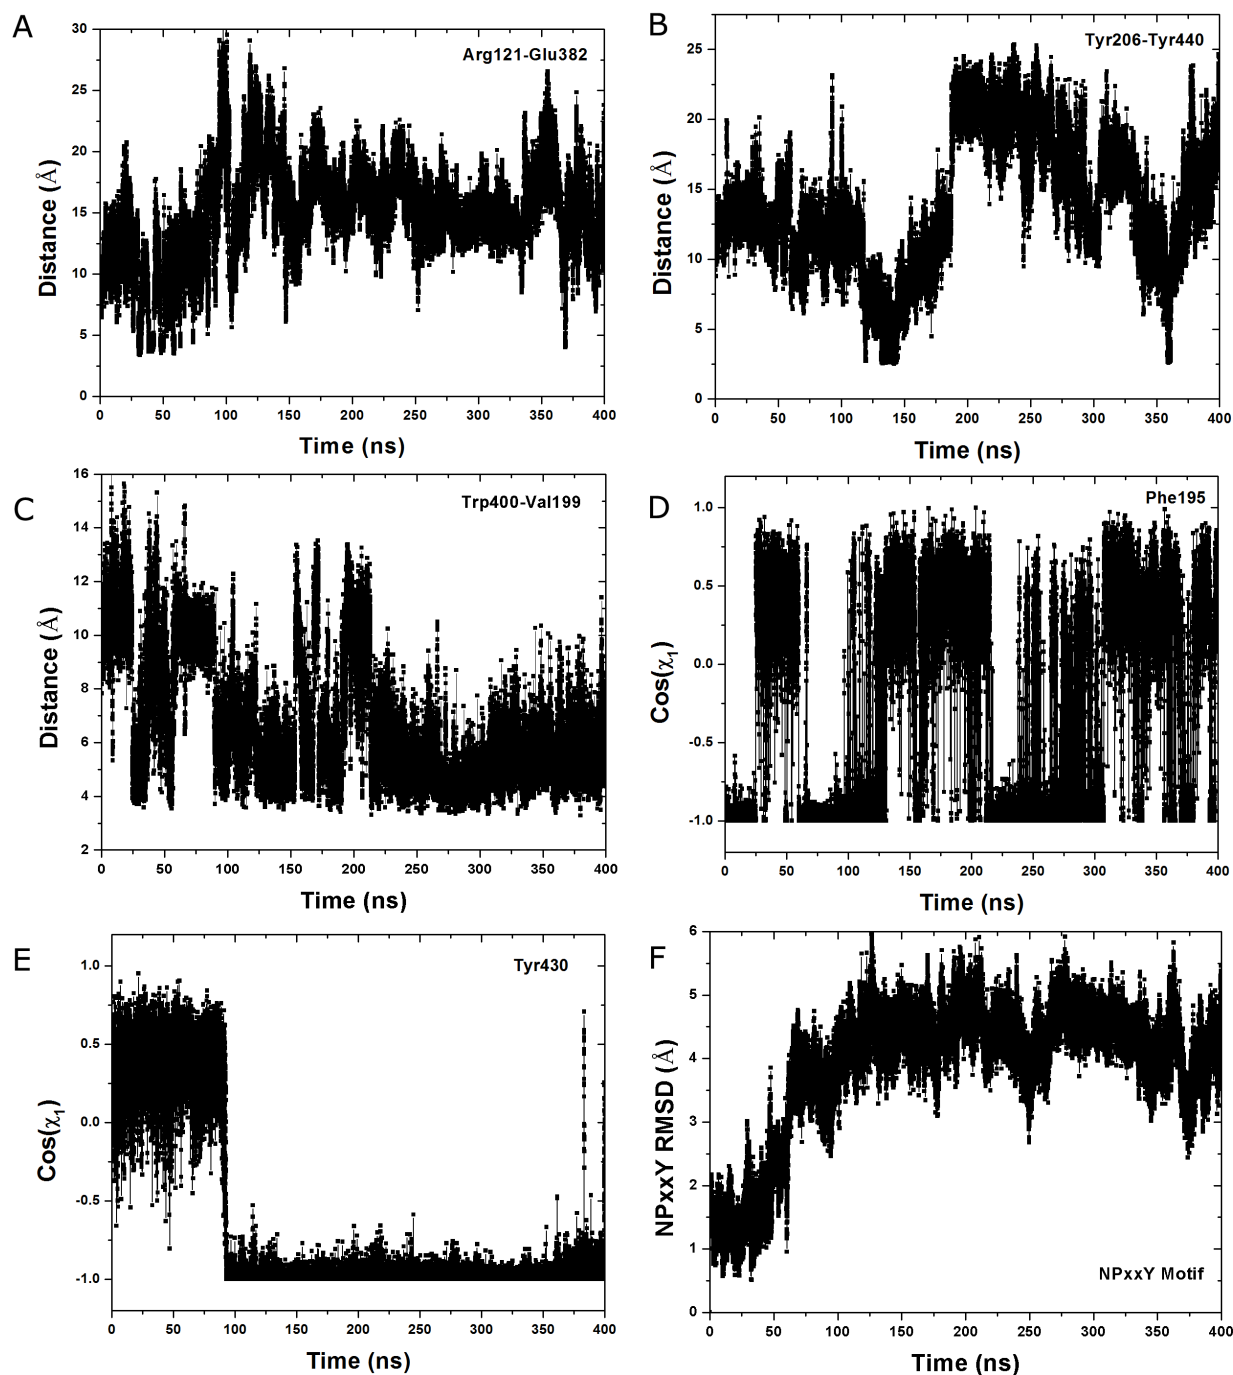

**Fig. S8** Timecourses of (A) the distance between the  $C_\zeta$  atom of Arg121<sup>3.50</sup> and  $C_\delta$  of Glu382<sup>6.30</sup> (“ionic lock”), (B) the distance between the side chain oxygen atoms of Tyr206<sup>5.58</sup> and Tyr440<sup>7.53</sup>, (C) the distance between  $C_6$  of Trp400<sup>6.48</sup> and  $C_\beta$  of Val199<sup>5.51</sup>, (D) cosine of the dihedral angle  $\chi_1$  in the side chain of Phe195<sup>5.47</sup>, (E) cosine of the dihedral angle  $\chi_1$  in the side chain of Tyr430<sup>7.43</sup> and (F) RMSD of the NPxxY motif relative to the inactive X-ray conformation.

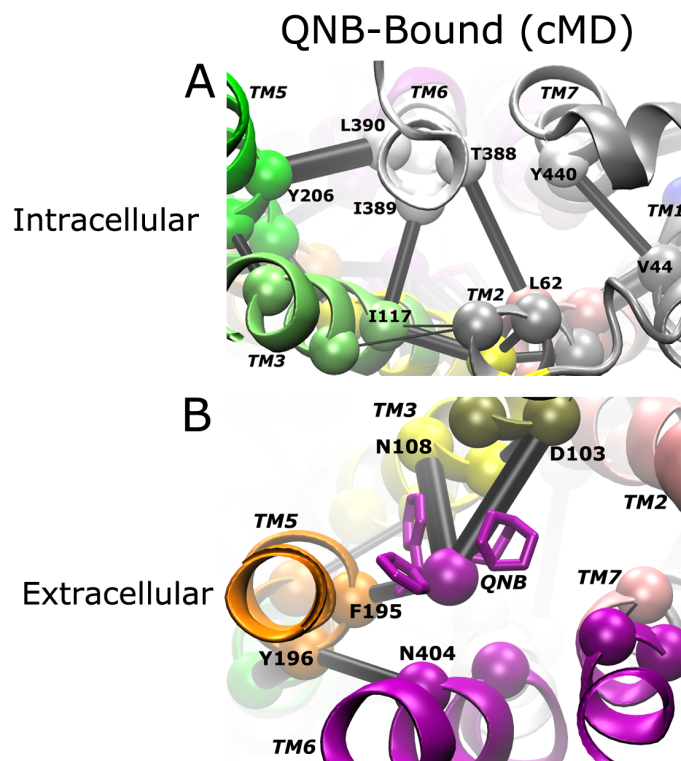

**Fig. S9** Strong (A) intracellular and (B) extracellular networks connecting the TM3, TM5, TM6 and TM7 helices are observed in the 100 ns cMD simulation of the QNB-bound M2 receptor. The same representations are used as in **Fig. 3**.

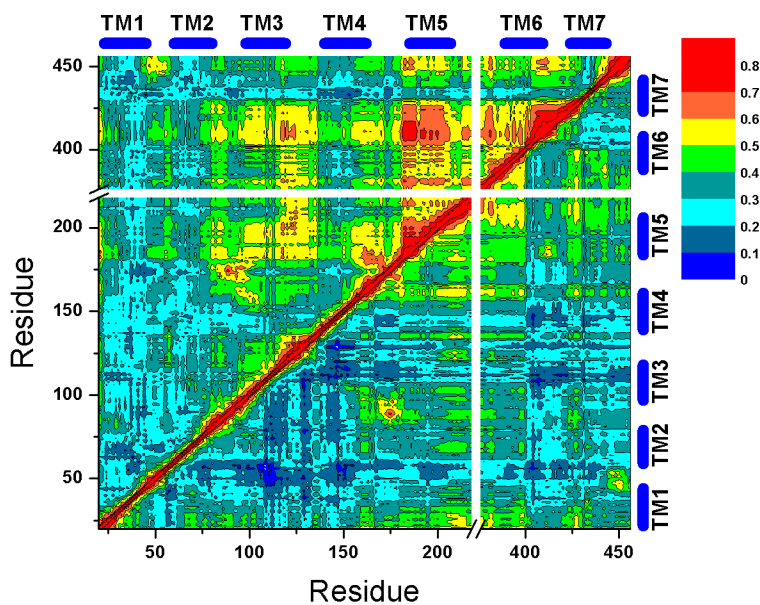

**Fig. S10** Dynamic map of residue cross-correlations calculated from 100 ns cMD simulations of the QNB-bound (lower triangle) and apo (upper triangle) M2 receptor.

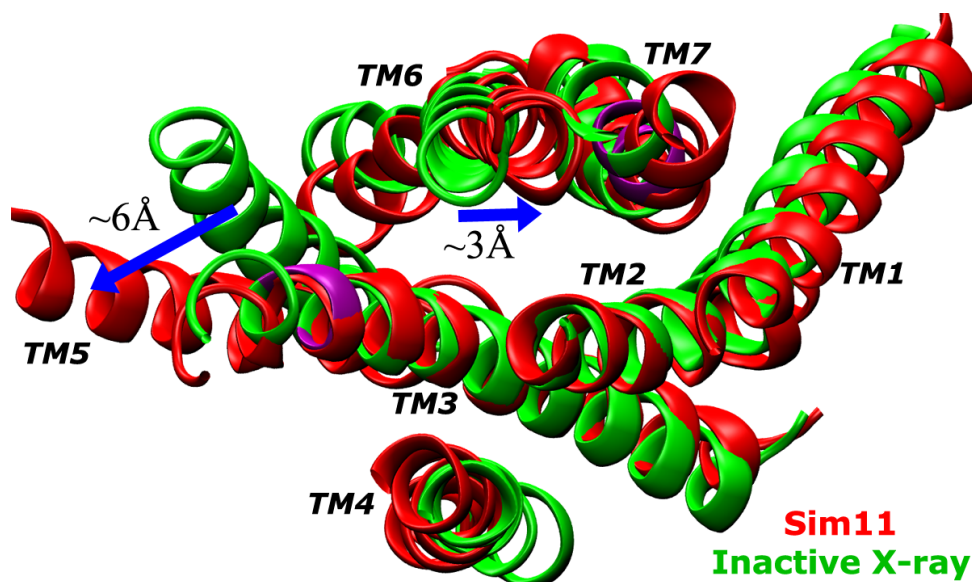

**Fig. S11** A different conformation of the M2 receptor observed in Sim11 that depicts shearing motion of intracellular domains of TM6 and TM7 towards TM1 by  $\sim 3 \text{ \AA}$  and outward movement of the TM5 cytoplasmic end by  $\sim 6 \text{ \AA}$  relative to the inactive X-ray conformation.

### Supporting Movies

**Movie S1** In a 100 *ns* dihedral aMD simulation, the apo M2 receptor (red) maintains a conformation similar to the inactive X-ray structure (green), although the Arg121<sup>3.50</sup>-Glu382<sup>6.30</sup> salt bridge (sticks) is broken through the simulation.

**Movie S2** Anton simulations of the M2 receptor that started from the QNB-removed X-ray structure captured binding of antagonist tiotropium to an extracellular vestibule, but not to the orthosteric binding site(11). In these Anton simulations, the receptor (red) is found to maintain its inactive X-ray conformation (green) stabilized by the Arg121<sup>3.50</sup>-Glu382<sup>6.30</sup> salt bridge.

**Movie S3** In a 400 *ns* dual-boost aMD simulation, activation of the apo M2 receptor (red) from the inactive X-ray conformation (green) is observed, characterized by formation of a Tyr206<sup>5.58</sup>-Tyr440<sup>7.53</sup> hydrogen bond in the G-protein coupling site and  $\sim 6 \text{ \AA}$  outward tilting of the cytoplasmic end of TM6. The Arg121<sup>3.50</sup>-Glu382<sup>6.30</sup> salt bridge is broken during activation of the receptor.

## Appendix S1 Force field parameters of QNB obtained from CHARMM ParamChem web server

\* Toppar stream file generated by  
\* CHARMM General Force Field (CGenFF) program version 0.9.6 beta  
\* For use with CGenFF version 2b7

read rtf card append

\* Topologies generated by  
\* CHARMM General Force Field (CGenFF) program version 0.9.6 beta  
\* using valence-based bond orders  
36 1

! "penalty" is the highest penalty score of the associated parameters.  
! Penalties lower than 10 indicate the analogy is fair; penalties between 10  
! and 50 mean some basic validation is recommended; penalties higher than  
! 50 indicate poor analogy and mandate extensive validation/optimization.

```
RESI QNB      1.000 ! param penalty= 51.000 ; charge penalty= 53.444
GROUP        ! CHARGE  CH_PENALTY
ATOM C1      CG301  0.026 ! 53.444
ATOM C2      CG2R61 -0.066 ! 38.075
ATOM C3      CG2R61 -0.054 ! 26.073
ATOM C4      CG2R61 -0.114 !  0.426
ATOM C5      CG2R61 -0.115 !  0.000
ATOM C6      CG2R61 -0.114 !  0.426
ATOM C7      CG2R61 -0.054 ! 26.073
ATOM C8      CG2R61 -0.066 ! 38.075
ATOM C9      CG2R61 -0.054 ! 26.073
ATOM C10     CG2R61 -0.114 !  0.426
ATOM C11     CG2R61 -0.115 !  0.000
ATOM C12     CG2R61 -0.114 !  0.426
ATOM C13     CG2R61 -0.054 ! 26.073
ATOM C14     CG2O2  0.945 ! 38.535
ATOM O15     OG311 -0.658 ! 24.388
ATOM O16     OG2D1 -0.618 ! 13.928
ATOM O17     OG302 -0.491 !  4.839
ATOM C18     CG311  0.139 !  4.588
ATOM C19     CG324  0.061 !  4.512
ATOM N20     NG3P1  0.112 !  0.449
ATOM C21     CG324  0.044 !  0.228
ATOM C22     CG321 -0.182 !  1.934
ATOM C23     CG311 -0.046 !  3.590
ATOM C24     CG321 -0.182 !  1.934
ATOM C25     CG324  0.044 !  0.228
ATOM H18     HGA1  0.090 !  0.000
ATOM H23     HGA1  0.090 !  0.424
ATOM H242    HGA2  0.090 !  0.000
ATOM H243    HGA2  0.090 !  0.000
ATOM H252    HGA2  0.090 !  0.000
ATOM H253    HGA2  0.090 !  0.000
ATOM H20     HGP2  0.191 !  0.000
ATOM H212    HGA2  0.090 !  0.000
ATOM H213    HGA2  0.090 !  0.000
ATOM H222    HGA2  0.090 !  0.000
ATOM H223    HGA2  0.090 !  0.000
```

|           |       |         |       |
|-----------|-------|---------|-------|
| ATOM H192 | HGA2  | 0.090 ! | 0.351 |
| ATOM H193 | HGA2  | 0.090 ! | 0.351 |
| ATOM H13  | HGR61 | 0.115 ! | 0.060 |
| ATOM H12  | HGR61 | 0.115 ! | 0.000 |
| ATOM H11  | HGR61 | 0.115 ! | 0.000 |
| ATOM H10  | HGR61 | 0.115 ! | 0.000 |
| ATOM H9   | HGR61 | 0.115 ! | 0.060 |
| ATOM H7   | HGR61 | 0.115 ! | 0.060 |
| ATOM H6   | HGR61 | 0.115 ! | 0.000 |
| ATOM H5   | HGR61 | 0.115 ! | 0.000 |
| ATOM H4   | HGR61 | 0.115 ! | 0.000 |
| ATOM H3   | HGR61 | 0.115 ! | 0.060 |
| ATOM H15  | HGP1  | 0.419 ! | 1.418 |

! Bond order

|           |     |     |
|-----------|-----|-----|
| BOND C1   | O15 | ! 1 |
| BOND H15  | O15 | ! 1 |
| BOND C1   | C14 | ! 1 |
| BOND C14  | O17 | ! 1 |
| BOND C18  | O17 | ! 1 |
| BOND H18  | C18 | ! 1 |
| BOND C18  | C23 | ! 1 |
| BOND H23  | C23 | ! 1 |
| BOND C23  | C24 | ! 1 |
| BOND H243 | C24 | ! 1 |
| BOND H242 | C24 | ! 1 |
| BOND C24  | C25 | ! 1 |
| BOND H253 | C25 | ! 1 |
| BOND H252 | C25 | ! 1 |
| BOND C25  | N20 | ! 1 |
| BOND H20  | N20 | ! 1 |
| BOND C21  | N20 | ! 1 |
| BOND H213 | C21 | ! 1 |
| BOND H212 | C21 | ! 1 |
| BOND C21  | C22 | ! 1 |
| BOND H223 | C22 | ! 1 |
| BOND H222 | C22 | ! 1 |
| BOND C22  | C23 | ! 1 |
| BOND C19  | N20 | ! 1 |
| BOND H193 | C19 | ! 1 |
| BOND H192 | C19 | ! 1 |
| BOND C18  | C19 | ! 1 |
| BOND C14  | O16 | ! 2 |
| BOND C1   | C8  | ! 1 |
| BOND C13  | C8  | ! 2 |
| BOND H13  | C13 | ! 1 |
| BOND C12  | C13 | ! 1 |
| BOND H12  | C12 | ! 1 |
| BOND C11  | C12 | ! 2 |
| BOND H11  | C11 | ! 1 |
| BOND C10  | C11 | ! 1 |
| BOND H10  | C10 | ! 1 |
| BOND C10  | C9  | ! 2 |
| BOND H9   | C9  | ! 1 |
| BOND C8   | C9  | ! 1 |
| BOND C1   | C2  | ! 1 |
| BOND C2   | C7  | ! 2 |

BOND H7 C7 !1  
 BOND C6 C7 !1  
 BOND H6 C6 !1  
 BOND C5 C6 !2  
 BOND H5 C5 !1  
 BOND C4 C5 !1  
 BOND H4 C4 !1  
 BOND C3 C4 !2  
 BOND H3 C3 !1  
 BOND C2 C3 !1  
 IMPR C14 C1 O16 O17

END

read param card flex append

BONDS

CG2O2 CG301 200.00 1.5220 ! QNB , from CG2O2 CG311, penalty= 8  
 CG2R61 CG301 230.00 1.4900 ! QNB , from CG2R61 CG311, penalty= 8

ANGLES

CG301 CG2O2 OG2D1 70.00 125.00 20.00 2.44200 ! QNB , from CG311 CG2O2 OG2D1, penalty= 1.2  
 CG301 CG2O2 OG302 55.00 109.00 20.00 2.32600 ! QNB , from CG311 CG2O2 OG302, penalty= 1.2  
 CG2R61 CG2R61 CG301 45.80 120.00 ! QNB , from CG2R61 CG2R61 CG311, penalty= 1.2  
 CG2O2 CG301 CG2R61 51.80 107.50 ! QNB , from CG2O3 CG311 CG2R61, penalty= 20.5  
 CG2O2 CG301 OG311 112.00 122.50 ! QNB , from CG2O5 CG311 OG311, penalty= 10  
 CG2R61 CG301 CG2R61 51.80 107.50 ! QNB , from CG2R61 CG321 CG2R61, penalty= 12  
 CG2R61 CG301 OG311 75.70 110.10 ! QNB , from CG2R61 CG321 OG311, penalty= 12  
 CG311 CG311 CG324 58.35 110.50 11.16 2.56100 ! QNB , from CG321 CG311 CG324, penalty= 0.6  
 CG311 CG311 OG302 115.00 109.70 ! QNB , from CG321 CG311 OG302, penalty= 0.6  
 CG324 CG311 OG302 75.70 110.10 ! QNB , from CG324 CG321 OG302, penalty= 4

DIHEDRALS

OG2D1 CG2O2 CG301 CG2R61 0.0000 1 0.00 ! QNB , from OG2D1 CG2O2 CG311 NG2S1, penalty= 51  
 OG2D1 CG2O2 CG301 OG311 0.0000 2 0.00 ! QNB , from OG2D3 CG2O5 CG311 OG311, penalty= 18.5  
 OG302 CG2O2 CG301 CG2R61 0.0000 1 0.00 ! QNB , from OG302 CG2O2 CG311 NG2S1, penalty= 51  
 OG302 CG2O2 CG301 OG311 0.0500 6 180.00 ! QNB , from OG302 CG2O2 CG311 CG321, penalty= 50  
 CG301 CG2O2 OG302 CG311 2.0500 2 180.00 ! QNB , from CG311 CG2O2 OG302 CG321, penalty= 1.8  
 CG2R61 CG2R61 CG2R61 CG301 3.1000 2 180.00 ! QNB , from CG2R61 CG2R61 CG2R61 CG311,  
 penalty= 1.2  
 CG301 CG2R61 CG2R61 HGR61 2.4000 2 180.00 ! QNB , from CG311 CG2R61 CG2R61 HGR61, penalty=  
 1.2  
 CG2R61 CG2R61 CG301 CG2O2 0.2300 2 180.00 ! QNB , from CG2R61 CG2R61 CG311 CG2O3, penalty=  
 20.5  
 CG2R61 CG2R61 CG301 CG2R61 0.2300 2 180.00 ! QNB , from CG2R61 CG2R61 CG321 CG2R61,  
 penalty= 12  
 CG2R61 CG2R61 CG301 OG311 0.0000 2 0.00 ! QNB , from CG2R61 CG2R61 CG321 OG311, penalty=  
 12  
 CG2O2 CG301 OG311 HGP1 0.2200 1 0.00 ! QNB , from CG2O5 CG311 OG311 HGP1, penalty= 10  
 CG2O2 CG301 OG311 HGP1 0.2300 2 180.00 ! QNB , from CG2O5 CG311 OG311 HGP1, penalty= 10  
 CG2O2 CG301 OG311 HGP1 0.4200 3 0.00 ! QNB , from CG2O5 CG311 OG311 HGP1, penalty= 10  
 CG2R61 CG301 OG311 HGP1 2.1000 1 0.00 ! QNB , from CG2R61 CG321 OG311 HGP1, penalty= 12  
 CG2R61 CG301 OG311 HGP1 1.4000 2 0.00 ! QNB , from CG2R61 CG321 OG311 HGP1, penalty= 12  
 CG2R61 CG301 OG311 HGP1 1.1000 3 0.00 ! QNB , from CG2R61 CG321 OG311 HGP1, penalty= 12  
 CG321 CG311 CG311 CG324 0.2000 3 0.00 ! QNB , from CG321 CG311 CG321 CG324, penalty= 4  
 CG321 CG311 CG311 OG302 0.2000 3 180.00 ! QNB , from CG321 CG311 CG321 OG302, penalty= 4



|       |       |       |       |         |   |                                                           |
|-------|-------|-------|-------|---------|---|-----------------------------------------------------------|
| CG324 | CG311 | CG311 | HGA1  | 0.1950  | 3 | 0.00 ! QNB , from CG324 CG311 CG321 HGA2, penalty= 4      |
| OG302 | CG311 | CG311 | HGA1  | 0.1950  | 3 | 0.00 ! QNB , from OG302 CG311 CG321 HGA2, penalty= 4      |
| CG311 | CG311 | CG321 | CG324 | 0.2000  | 3 | 0.00 ! QNB , from CG321 CG311 CG321 CG324, penalty= 0.6   |
| CG311 | CG311 | CG324 | NG3P1 | 0.1950  | 3 | 0.00 ! QNB , from CG321 CG311 CG324 NG3P1, penalty= 0.6   |
| CG311 | CG311 | CG324 | HGA2  | 0.1950  | 3 | 0.00 ! QNB , from CG321 CG311 CG324 HGA2, penalty= 0.6    |
| OG302 | CG311 | CG324 | NG3P1 | 3.3000  | 1 | 180.00 ! QNB , from OG302 CG321 CG324 NG3P0, penalty= 5.2 |
| OG302 | CG311 | CG324 | NG3P1 | -0.4000 | 3 | 180.00 ! QNB , from OG302 CG321 CG324 NG3P0, penalty= 5.2 |
| OG302 | CG311 | CG324 | HGA2  | 0.1950  | 3 | 0.00 ! QNB , from OG302 CG311 CG321 HGA2, penalty= 1      |
| CG311 | CG311 | OG302 | CG2O2 | 0.7000  | 1 | 180.00 ! QNB , from CG321 CG311 OG302 CG2O2, penalty= 0.6 |
| CG324 | CG311 | OG302 | CG2O2 | 0.0000  | 3 | 0.00 ! QNB , from CG324 CG321 OG302 CG2O2, penalty= 4     |

IMPROPERS

|       |       |       |       |         |   |                                                         |
|-------|-------|-------|-------|---------|---|---------------------------------------------------------|
| CG2O2 | CG301 | OG2D1 | OG302 | 62.0000 | 0 | 0.00 ! QNB , from CG2O2 CG311 OG2D1 OG302, penalty= 0.8 |
|-------|-------|-------|-------|---------|---|---------------------------------------------------------|

END

RETURN

## Appendix S2 Sample NAMD config file for running aMD simulation of GPCRs.

```
#####  
## Sample NAMD config file for running  
## Accelerated Molecular Dynamics (aMD) simulation.  
#####  
#  
set aMD          1  
#  
set molname      sys  
#  
# Input  
paraTypeCharmm  on  
parameters      ~/sim-common/par_all36_prot.prm  
parameters      ~/sim-common/par_all36_lipid.prm  
parameters      ~/sim-common/par_all36_cgenff.prm  
parameters      ~/sim-common/par_water_ions.str  
parameters      ~/sim-common/top_c36_qnb.rtf  
#  
set Minsteps    0  
#  
set heating     0  
set HeatSteps   5  
set HeatMDsteps 1000  
#  
set NVEEquilsteps 0  
set MDEquilsteps 0  
#  
set start       0  
set end         10000000  
set MDsteps     [expr $end-$start]  
set restart     1  
#  
set temperature 310  
set pressure    1.01325 ;# in bar -> 1 atm  
set outputname  ${molname}-out  
set dcdfreq    500  
set restartfreq 100000  
#  
structure       ${molname}.psf  
coordinates     ${molname}.pdb  
#  
# set control parameters  
#  
set fixatoms    0  
set consatoms   0  
set tclF        0  
#  
set NVE         0  
set NVT         0  
set NPT         1  
#  
if {$NVE} {  
    set PBC      1  
    set PME      1  
    set T        0  
    set P        0  
}
```

```

if {$NVT} {
  set PBC          1
  set PME          1
  set T            1
  set P            0
}
#
if {$NPT} {
  set PBC          1
  set PME          1
  set T            1
  set P            1
}
#
# Continuing a job from the restart files
# NOTE: Do not set the initial velocity temperature if you
# have also specified a .vel restart file!
if {$restart} {
  binCoordinates   ${molname}-out.restart.${start}.coor
  extendedSystem   ${molname}-out.restart.${start}.xsc
  binVelocities    ${molname}-out.restart.${start}.vel ;# remove the
"temperature" entry if you use this!
} else {
  temperature      $temperature
}
#
#####
## SIMULATION PARAMETERS ##
#####
#
# Periodic Boundary conditions
# NOTE: Do not set the periodic cell basis if you have also
# specified an .xsc restart file!
if {$PBC} {
  cellBasisVector1  87    0.    0.
  cellBasisVector2   0.   84    0.
  cellBasisVector3   0.    0.   87
  cellOrigin         0.11295974999666214 0.2920728027820587 4.683454990386963
  wrapWater          off
  wrapAll            off
}
#
#PME (for full-system periodic electrostatics)
if {$PME} {
  PME                yes
  PMEGridSpacing     1
}
#
# Force-Field Parameters
exclude              scaled1-4
1-4scaling           1.0
cutoff               12.
switching            on
switchdist           10.
pairlistdist         13.5
# margin              3
#
# Integrator Parameters

```

```

timestep                2.0  ;# 1 fs/step
rigidBonds              all  ;# needed for 2fs steps
nonbondedFreq          1
fullElectFrequency     2
stepspercycle          10
#
#
# Constant Temperature Control
if {$T} {
  langevin              on    ;# do langevin dynamics
  langevinDamping       1     ;# damping coefficient (gamma) of 5/ps
  langevinTemp          $temperature
  langevinHydrogen      off   ;# don't couple langevin bath to hydrogens
}
#
#
useGroupPressure        yes ;# needed for 2fs steps
useFlexibleCell        yes  ;# no for water box, yes for membrane
useConstantRatio       yes  ;# no for water box, yes for membrane
useConstantArea        no   ;# no for water box, yes for membrane
#
# Constant Pressure Control (variable volume)
if {$P} {
  langevinPiston        on
  langevinPistonTarget  1.01325 ;# in bar -> 1 atm
  langevinPistonPeriod  200.
  langevinPistonDecay   50.
  langevinPistonTemp    $temperature
}
#
#
# Output
outputName              $outputname
dcdfreq                $dcdfreq
xstFreq                $dcdfreq
# velDCDfile           ${outputname}-vel.dcd
# velDCDfreq           $dcdfreq
outputTiming            $dcdfreq
outputEnergies          $dcdfreq
#
restartsave             yes
binaryrestart           yes
restartfreq             $restartfreq
#
#####
## EXTRA PARAMETERS                                     ##
#####
# Put here any custom parameters that are specific to
# this job (e.g., SMD, TclForces, etc...)
#
# Fixed Atoms Constraint (set PDB beta-column to 1)
if {$fixatoms} {
  fixedAtoms            on
  fixedAtomsFile        ${molname}-fixatoms-notLipidTails.pdb
  fixedAtomsCol         B
}
#
# Add Harmonic Atoms Constraint (set PDB beta-column to 1)

```

```

if {$consatoms} {
  constraints      on
  consexp         2
  consref         ${molname}.pdb
  conskfile       ${molname}-fixatoms-xray.pdb
  conskcol        B
  margin          3
}
#
# Add TCL forces
if {$tclF} {
  tclforces       on
  set waterCheckFreq 100
  set lipidCheckFreq 100
  set allatompdb   ${molname}.pdb
  tclForcesScript ~/sim-common/keep_water_out.tcl
}
#
# IMD Settings (can view sim in VMD)
if {0} {
  IMDon           on
  IMDport         3000      ;# port number (enter it in VMD)
  IMDfreq         1        ;# send every 1 frame
  IMDwait         no       ;# wait for VMD to connect before running?
}
#
# aMD Settings
if {$aMD} {
  accelMD         on
  accelMDdihe     on
  accelMDE        12623    ;# Threshold energy E
  accelMDalpha    583      ;# Acceleration factor alpha
  accelMDdual     on       ;# change to "off" for dihedral aMD only
  accelMDTE       -105513
  accelMDTalpha   11094    ;# Acceleration factor alpha the dual boost mode
  accelMDFirstStep 0
  accelMDLastStep 0
  accelMDOutFreq  $dcdfreq
}
#
#####
## EXECUTION SCRIPT                                     ##
#####
#
# Minimization
if {$Minsteps > 0} {
  minimize        $Minsteps
  reinitvels      $temperature
  output          ${outputname}.restart.Min
  output          ${outputname}.restart.0
}
# Heating
if {$heating} {
  for {set i 1} {$i <= $HeatSteps} {incr i} {
    set temp      [expr $temperature*$i/$HeatSteps]; puts "Heat structure to
$temp K for $HeatMDsteps steps."
    reinitvels    $temp
    run $HeatMDsteps
  }
}

```

```

}
output  ${outputname}.restart.heating
output  ${outputname}.restart.0
reinitvels      $temperature
}
#
# NVE equilibration
if {$NVEEquilsteps > 0} {
  firsttimestep  0
  reinitvels      $temperature
  run              $NVEEquilsteps
  output  ${outputname}.restart.NVEequil
  output  ${outputname}.restart.0
}
#
if {$MDEquilsteps > 0} {
  firsttimestep  0
  reinitvels      $temperature
  run              $MDEquilsteps
  output  ${outputname}.restart.MDequil
  output  ${outputname}.restart.0
}
# product MD run
if {$MDsteps > 0} {
  firsttimestep  $start
  run              $MDsteps
}
}

```

## References

1. Hamelberg D, Mongan J, McCammon JA (2004) Accelerated molecular dynamics: A promising and efficient simulation method for biomolecules. *Journal of Chemical Physics* 120(24):11919-11929.
2. Hamelberg D, de Oliveira CAF, McCammon JA (2007) Sampling of slow diffusive conformational transitions with accelerated molecular dynamics. *Journal of Chemical Physics* 127(15).
3. Markwick PRL, McCammon JA (2011) Studying functional dynamics in bio-molecules using accelerated molecular dynamics. *Physical Chemistry Chemical Physics* 13(45):20053-20065.
4. Sethi A, Eargle J, Black AA, Luthey-Schulten Z (2009) Dynamical networks in tRNA: protein complexes. *Proceedings of the National Academy of Sciences of the United States of America* 106(16):6620-6625.
5. Eargle J, Luthey-Schulten Z (2012) NetworkView: 3D display and analysis of protein-RNA interaction networks. *Bioinformatics* 28(22):3000-3001.
6. Lange OF, Grubmuller H (2006) Generalized correlation for biomolecular dynamics. *Proteins-Structure Function and Bioinformatics* 62(4):1053-1061.
7. Hess B, Kutzner C, van der Spoel D, Lindahl E (2008) GROMACS 4: Algorithms for Highly Efficient, Load-Balanced, and Scalable Molecular Simulation. *Journal of Chemical Theory and Computation* 4(3):435-447.
8. Haga K, *et al.* (2012) Structure of the human M2 muscarinic acetylcholine receptor bound to an antagonist. *Nature* 482(7386):547-551.
9. Dror RO, *et al.* (2011) Activation mechanism of the  $\beta$ 2-adrenergic receptor. *Proceedings of the National Academy of Sciences* 108(46):18684-18689.
10. Humphrey W, Dalke A, Schulten K (1996) VMD: Visual molecular dynamics. *Journal of Molecular Graphics & Modelling* 14(1):33-38.
11. Kruse AC, *et al.* (2012) Structure and dynamics of the M3 muscarinic acetylcholine receptor. *Nature* 482(7386):552-556.
12. Phillips JC, *et al.* (2005) Scalable molecular dynamics with NAMD. *Journal of Computational Chemistry* 26(12):1781-1802.
13. MacKerell AD, *et al.* (1998) All-Atom Empirical Potential for Molecular Modeling and Dynamics Studies of Proteins. *J. Phys. Chem. B* 102(18):3586-3616.
14. MacKerell AD, Jr., Feig M, Brooks CL, 3rd (2004) Improved treatment of the protein backbone in empirical force fields. *J Am Chem Soc* 126(3):698-699.
15. Klauda JB, *et al.* (2010) Update of the CHARMM All-Atom Additive Force Field for Lipids: Validation on Six Lipid Types. *The Journal of Physical Chemistry B* 114(23):7830-7843.
16. Jorgensen WL, Chandrasekhar J, Madura JD, Impey RW, Klein ML (1983) Comparison of Simple Potential Functions for Simulating Liquid Water. *Journal of Chemical Physics* 79(2):926-935.
17. Vanommeslaeghe K, *et al.* (2010) CHARMM general force field: A force field for drug-like molecules compatible with the CHARMM all-atom additive biological force fields. *Journal of Computational Chemistry* 31(4):671-690.
18. Essmann U, *et al.* (1995) A Smooth Particle Mesh Ewald Method. *Journal of Chemical Physics* 103(19):8577-8593.

19. Ryckaert J-P, Ciccotti G, Berendsen HJC (1977) Numerical integration of the cartesian equations of motion of a system with constraints: molecular dynamics of n-alkanes. *Journal of Computational Physics* 23(3):327-341.
20. Wang Y, Harrison CB, Schulten K, McCammon JA (2011) Implementation of Accelerated Molecular Dynamics in NAMD. *Computational Science and Discovery* 4(1).
21. Wereszczynski J, McCammon JA (2012) in *Computational Drug Discovery and Design, Methods in Molecular Biology*. ed. Barron R (Springer, Heidelberg), pp 515-524.
